# Supplementary material for: CRISPR/Cas9 Deletion of SOX2 Regulatory Region 2 (SRR2) Decreases SOX2 Malignant Activity in Glioblastoma
Source: PubMed Central journal article supplement (PMC8037847; doi:10.3390/cancers13071574), 2021-03-29
Supplement: cancers-13-01574-s001.pdf [file cancers-13-01574-s001.pdf]

# Supplementary Materials: *CRISPR/Cas9* Deletion of *SOX2* Regulatory Region 2 (*SRR2*) Decreases *SOX2* Malignant Activity in Glioblastoma

Ander Saenz-Antoñanzas, Veronica Moncho-Amor, Jaione Auzmendi-Iriarte, Alejandro Elua-Pinin, Karine Rizzoti, Robin Lovell-Badge and Ander Matheu

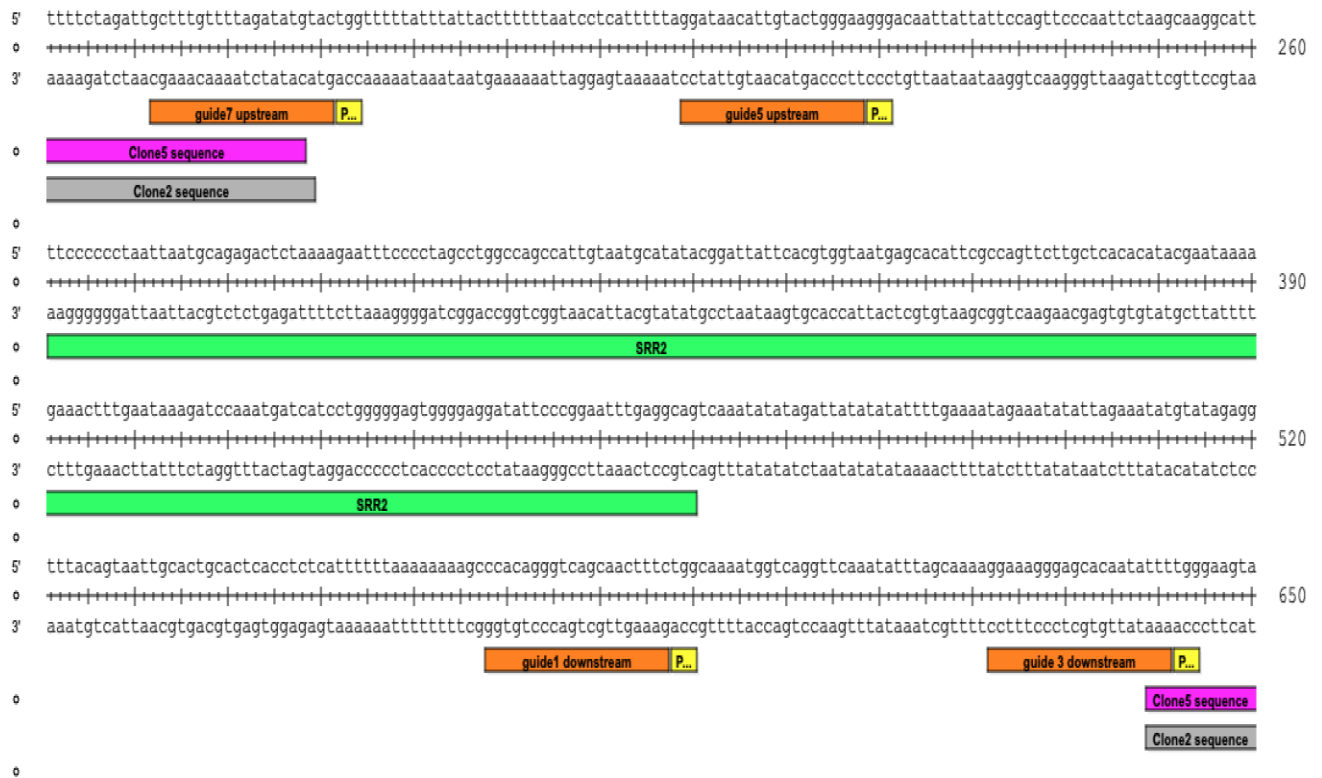

**Figure S1. Clone2 and Clone5 sequenced and matching in genomic human sequence of *SRR2*.** *SRR2* (200bp) is marked by a green box. The location of the external (guide 7\_5' and guide 3\_3') and internal (guide 5\_5' and guide 1\_3') sgRNAs (orange box) is labelled including their PAM sequence (in yellow). Sequence of the Clone2 (grey box) and Clone5 (magenta box) cell lines carrying *SRR2* deletion represented from sequencing. The breakpoint is shown above the colourful squares that indicate the nucleotides remained from each clone sequence following the deletion.

A)

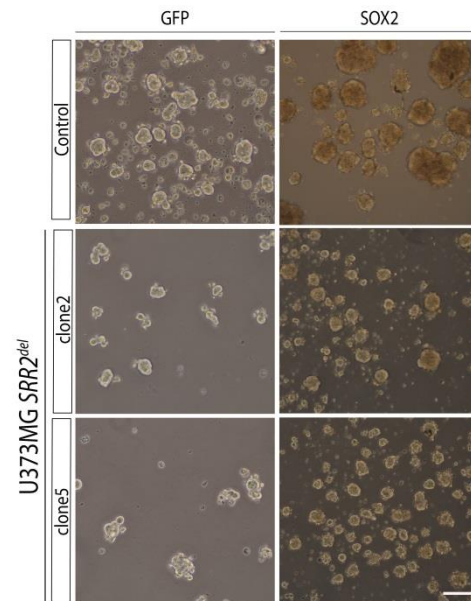

B)

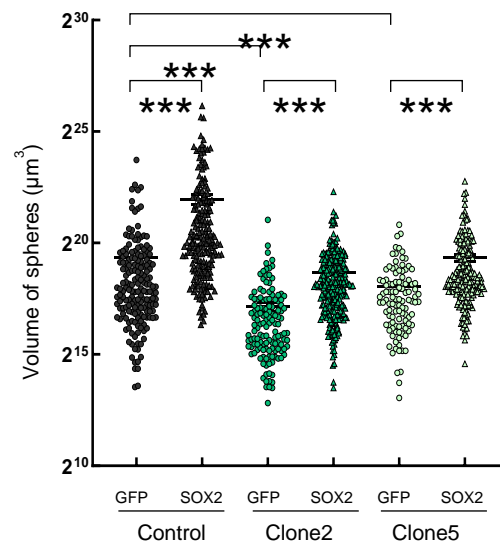

**Figure S2. Ectopic expression of *SOX2* rescues stem cell activity in *SRR2* deleted cells.** A) Representative images (scale bar=200 $\mu\text{m}$ ) and B) volume of primary oncospheres derived from control, clone2 and clone5 cells with ectopic expression of *SOX2* compared to GFP control, clone2 and clone5 cells and secondary oncospheres obtained after disaggregation of primary oncospheres. (n=4).

A

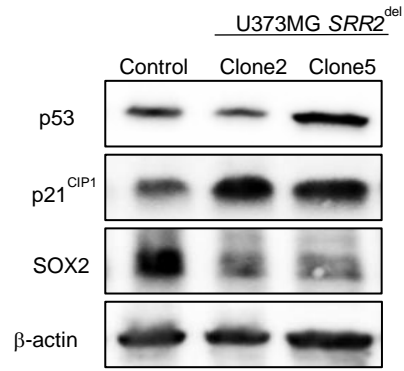

B

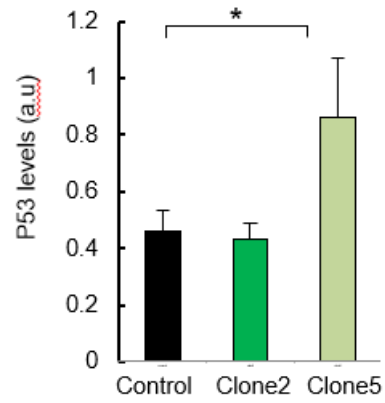

**Figure S3. A) Expression of p53 in *SRR2* deleted GBM cells.** Representative immunoblots of p53, p21<sup>CIP1</sup> and SOX2 in U373MG control and U373MG *SRR2*<sup>del</sup> clone2 and clone5 cells. **B) Quantification of p53 expression in GBM cells (n=3).**

Figure 1

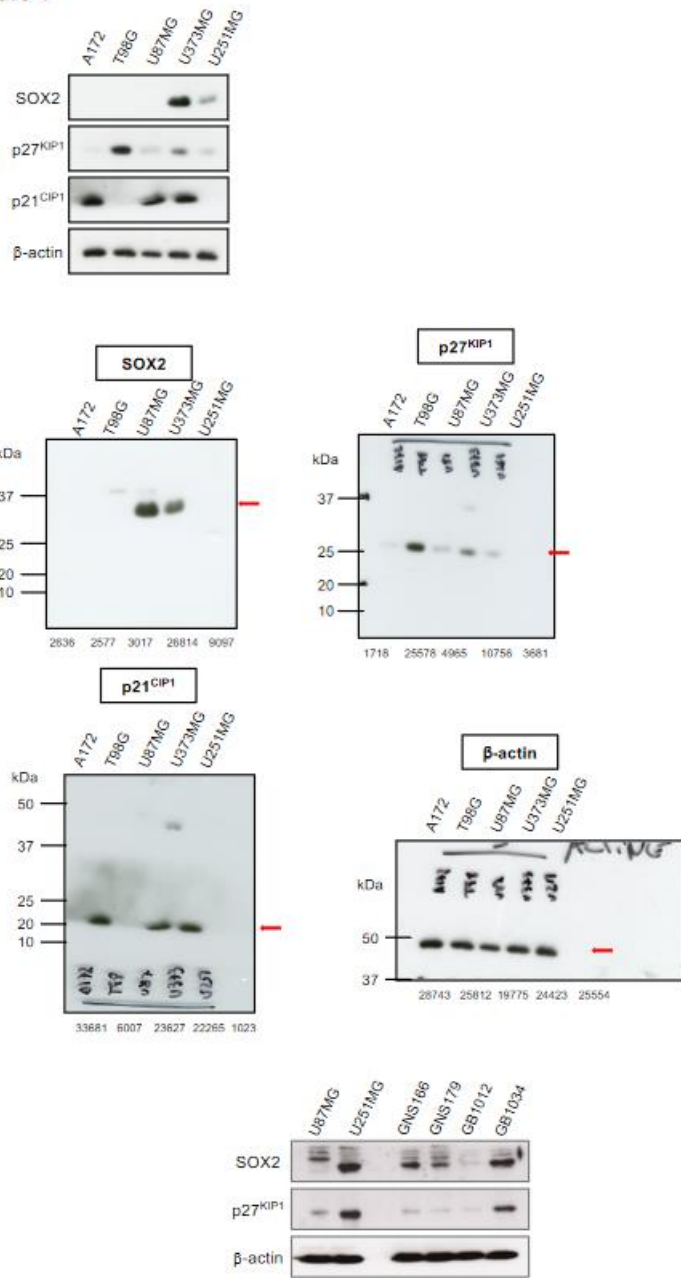

**Figure 2**

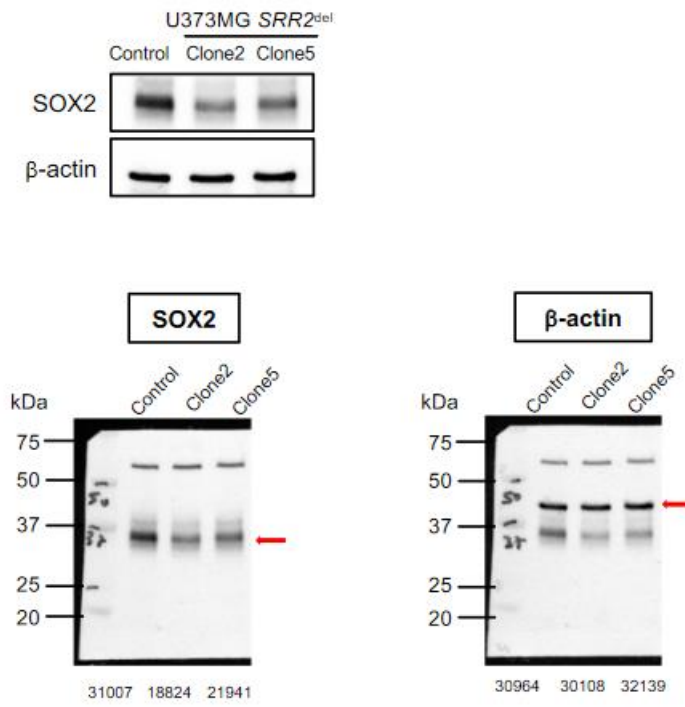

**Figure 4**

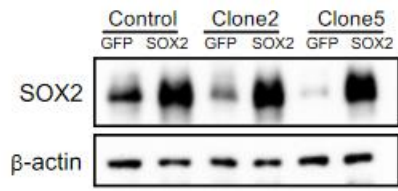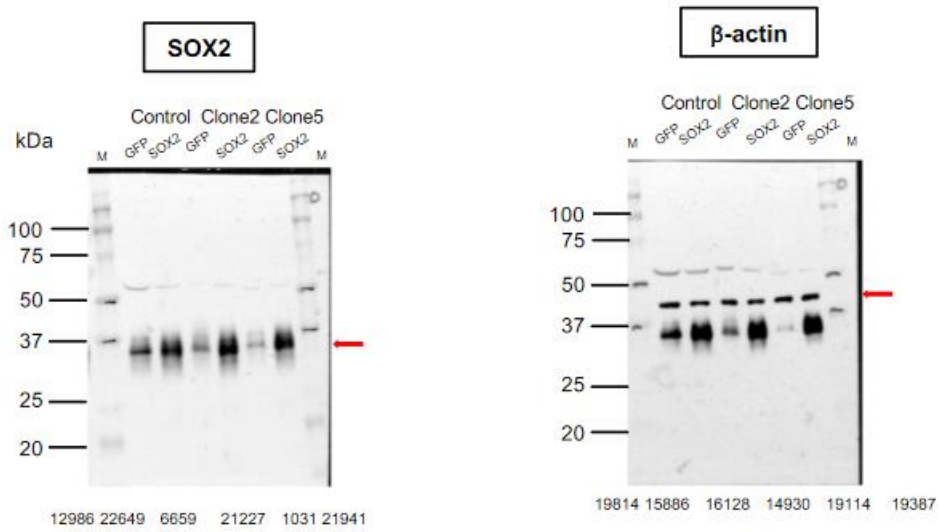

**Figure 5**

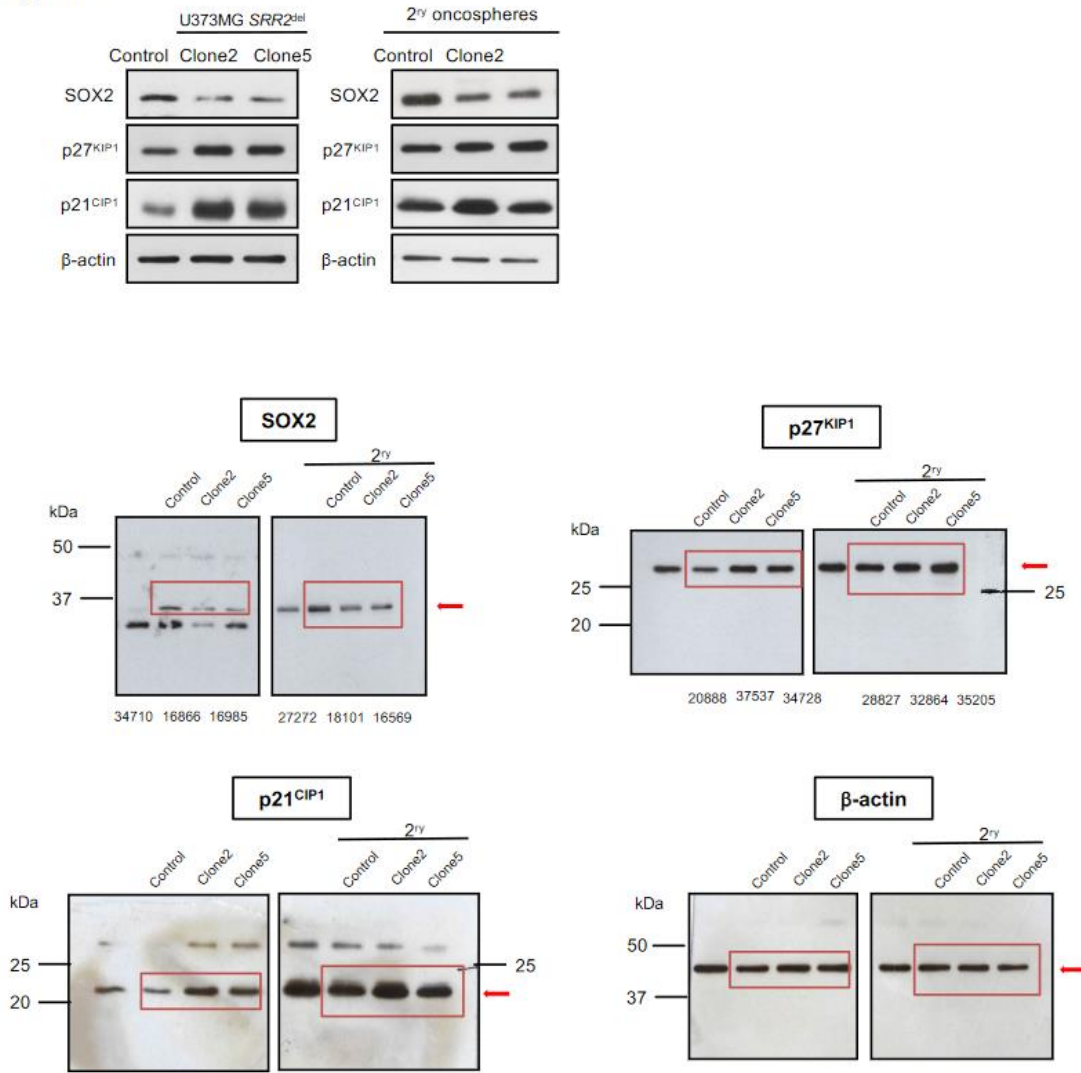

**Figure 5**

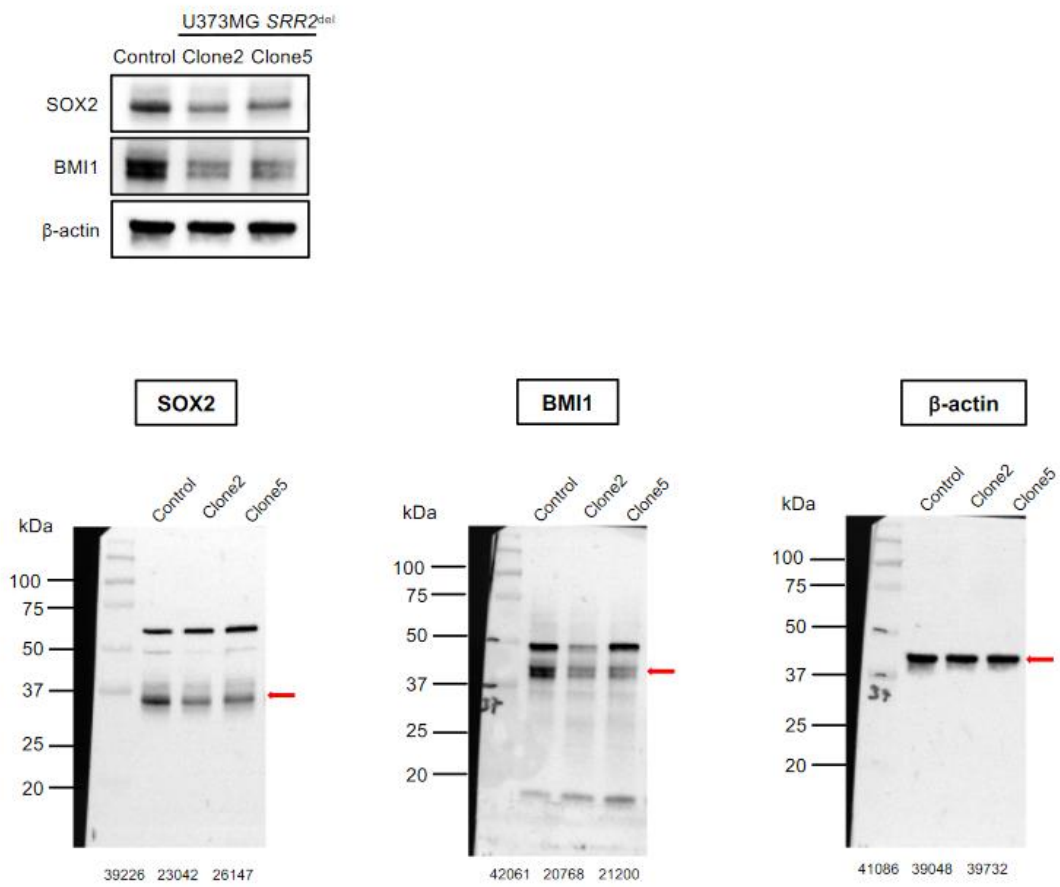



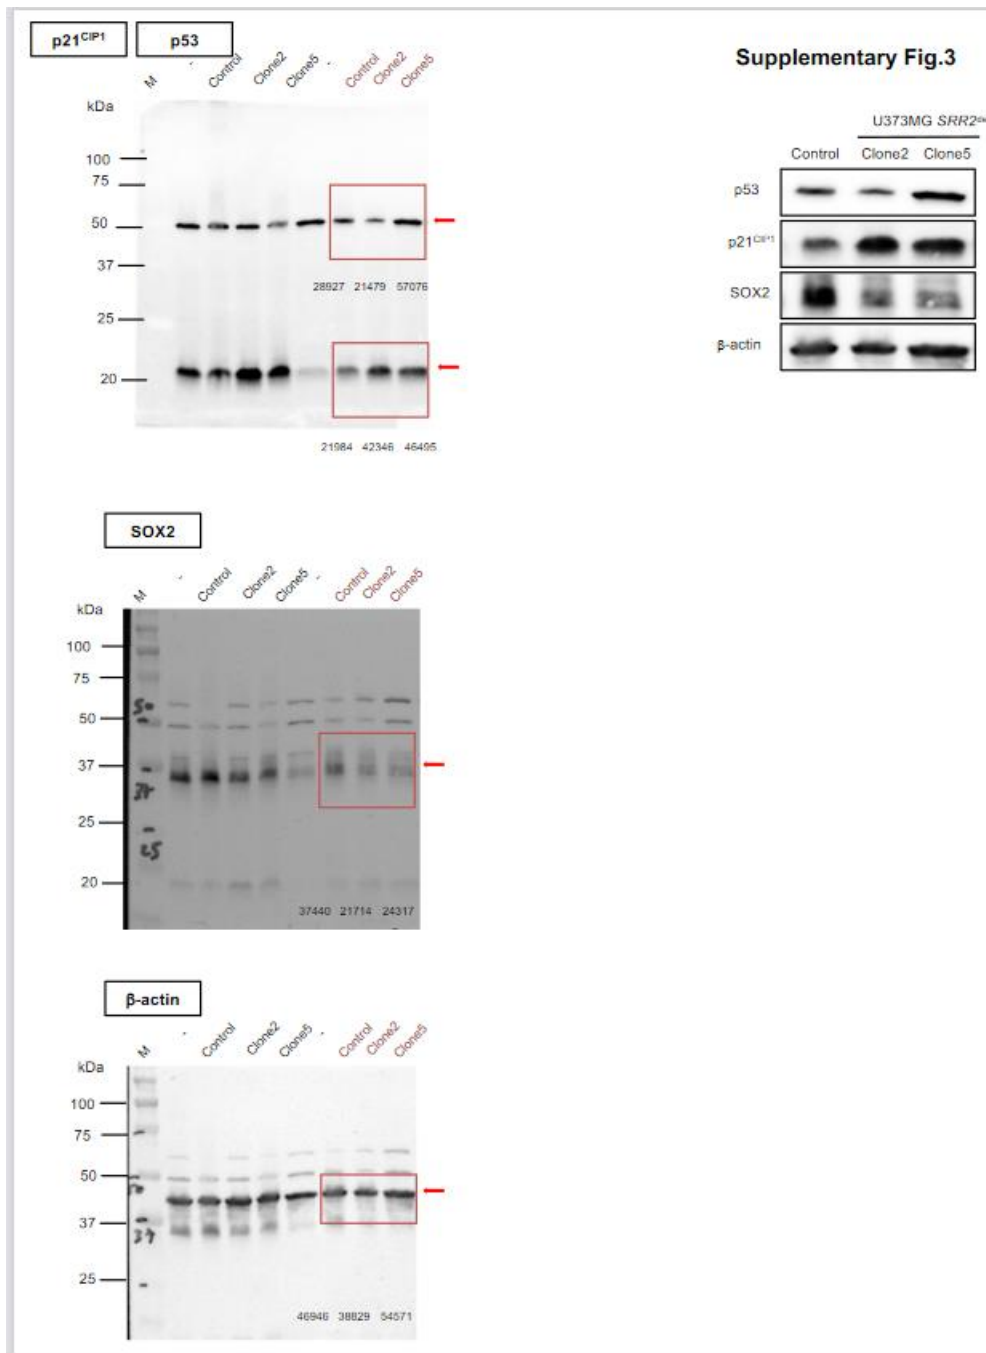

Figure S4. Uncropped Western Blots.

Table S1. Primers for CRISPR genome editing

| <i>sgRNA</i>            | <i>Primer name</i> | <i>Sequence 5' to 3' (20-mer sgRNA recognition sequences in bold)</i> |
|-------------------------|--------------------|-----------------------------------------------------------------------|
| GUIDE 7 UPSTREAM SRR2   | G7 UP SSR2_F       | 5' CACC <b>GCT TTG TTT TAG ATA TGT AC</b> 3'                          |
|                         | G7 UP SSR2_R       | 5' AAACGTACATATCTAAACAAGC 3'                                          |
| GUIDE 5 UPSTREAM SRR2   | G5 UP SSR2_F:      | 5' CACC <b>GGA TAA CAT TGT ACT GGG AA</b> 3'                          |
|                         | G5 UP SSR2_R:      | 5' AAACCTCCAGTACAATGTTATCC 3'                                         |
| GUIDE 1 DOWNSTREAM SRR2 | G1 DOWN SSR2_F     | 5' CACCG <b>CCA CAG GGT CAG CAA CTT TC</b> 3'                         |
|                         | G1 DOWN SSR2_R     | 5' AAACGAAAGTTGCTGACCCCTGTGGC 3'                                      |
| GUIDE 3 DOWNSTREAM SRR2 | G3 DOWN SSR2_F:    | 5' CACC <b>GGA AAG GGA GCA CAA TAT TT</b> 3'                          |
|                         | G3 DOWN SSR2_R:    | 5' AAAC AAATATTGTGCTCCCTTTCC3'                                        |
| pX330 plasmid           | uniR               | AAAAGCACCGACTCGGTGCC                                                  |

| <b>Table S2. Primers used for Genotyping and ChIP assay</b> |                                |                    |
|-------------------------------------------------------------|--------------------------------|--------------------|
| <b>Primer name</b>                                          | <b>Sequence 5' to 3'</b>       | <b>Application</b> |
| Sox2-SRR2-F                                                 | 5' ATTTATTCAGTTCCCAGTCCAAGC 3' | qPCR after ChIP    |
| Sox2-SRR2-R                                                 | 5' CCCTCTCCCCCCACGC 3'         | qPCR after ChIP    |
| SRR2_FORWARD                                                | 5' GCCACTAAGTTAGCTCATCC 3'     | Genotyping         |
| SSR2_REVERSE                                                | 5' ATATGAAGGGGTAGAAGGGG 3'     | Genotyping         |
